# Marked *Neurospora crassa* strains for competition experiments and Bayesian methods for fitness estimates

Ilkka Kronholm\*, Tereza Ormsby<sup>†,‡</sup>, Kevin J. McNaught<sup>†</sup>, Eric U. Selker<sup>†</sup>,  
Tarmo Ketola\*

\*Department of Biological and Environmental Sciences, University of Jyväskylä, FI-40014 Jyväskylä, Finland

<sup>†</sup>Institute of Molecular Biology, University of Oregon, Eugene, United States

<sup>‡</sup>Current address: Institute of Organic Chemistry and Biochemistry of the Czech Academy of Sciences, 16610 Prague 6, Czech Republic

Running Head: Competition experiments with *Neurospora*

Keywords: fungi, high resolution melting, competitive fitness, experimental evolution

Corresponding author:

Ilkka Kronholm

Department of Biological and Environmental Sciences,

University of Jyväskylä,

P.O. Box 35, FI-40014

Jyväskylä,

Finland

Fax +358 14 617 239

Email: [ilkka.kronholm@jyu.fi](mailto:ilkka.kronholm@jyu.fi)

## Abstract

2           The filamentous fungus *Neurospora crassa*, a model microbial eukaryote, has a life  
cycle with many features that make it suitable for studying experimental evolution.  
4           However, it has lacked a general tool for estimating relative fitness of different strains  
in competition experiments. To remedy this need, we constructed *N. crassa* strains  
6           that contain a modified *csr-1* locus and developed an assay for detecting the proportion  
of the marked strain using a post PCR high resolution melting assay. DNA extraction  
8           from spore samples can be performed on 96-well plates, followed by a PCR step, which  
allows many samples to be processed with ease. Furthermore, we suggest a Bayesian  
10          approach for estimating relative fitness from competition experiments that takes into  
account the uncertainty in measured strain proportions. We show that when combining  
12          all available information from different experiments the *csr-1\** allele has no detectable  
fitness effect, which makes it a suitable marker for competition experiments. However,  
14          there was an effect of the mating type locus, as mating type *mat a* has a higher fitness  
than *mat A*. As a proof of concept, we estimate the fitness effect of the *qde-2* mutation,  
16          a gene in the RNA interference pathway, and show that its competitive fitness is lower  
than what would be expected from its mycelial growth rate alone.

## 18 Introduction

The filamentous fungus *Neurospora crassa* is a model eukaryote with a wealth of genetic resources  
20 (ROCHE *et al.*, 2014; MCCLUSKEY *et al.*, 2010; COLOT *et al.*, 2006), and many aspects of its cellu-  
lar and molecular biology have been intensively studied (ROCHE *et al.*, 2014). There is now a great  
22 deal of interest to study evolution of *Neurospora* and other filamentous fungi experimentally (LEE  
and DIGHTON, 2010; GRAHAM *et al.*, 2014; ROMERO-OLIVARES *et al.*, 2015; BASTIAANS *et al.*,  
24 2016; FISHER and LANG, 2016; MEUNIER *et al.*, 2018). Despite having many beneficial char-  
acteristics for experimental evolution studies, *N. crassa* has lagged somewhat behind unicellular  
26 microbes in this area, as methodology for measuring competitive fitness has been missing.

Studying evolution of filamentous fungi is challenging because it is not clear how to define  
28 fitness in filamentous organisms (PRINGLE and TAYLOR, 2002). Many fungi have complicated  
life cycles, and individuals can be hard to define, complicating the choice of the appropriate fit-  
30 ness metric (PRINGLE and TAYLOR, 2002; GILCHRIST *et al.*, 2006). Moreover, individual fitness  
components, such as mycelial growth rate or conidial (asexual spore) production, are not neces-  
32 sarily strongly correlated with each other (ANDERSON *et al.*, 2018). Yet, modeling results have  
shown that for saprotrophic fungi that colonize discrete resource patches, such as *N. crassa*, spore  
34 production is the critical fitness component (GILCHRIST *et al.*, 2006). While different experimen-  
tal evolution protocols have been used for filamentous fungi, it has been shown that transferring  
36 spores to the next generation leads to the greatest response to selection (SCHOUSTRA *et al.*, 2005).  
Accordingly, one should measure fitness in conditions that correspond to the propagation condi-  
38 tions. Therefore, spore production is often the measure of interest. However, just comparing spore  
production of two different genotypes does not necessarily predict which of the genotypes would  
40 prevail when the two are competing against one another. From studies with bacteria, we know that  
predicting the winner of two competing genotypes from their individual characteristics is difficult,  
42 and the best method is to measure competitive fitness directly (LENSKI *et al.*, 1998).

To measure competitive fitness, one genotype needs to be tested against another, often the  
44 ancestor, and the proportions of these genotypes in culture need to be followed. This requires

that the genotypes are distinguishable. In controlled experiments, a morphological marker has  
46 undesirable fitness consequences, and often the genetic changes that happened between ancestor  
and derived genotypes are not fully known. Therefore, an engineered genetic marker is desirable.  
48 Some previous functional studies have used strains that express a fusion protein of histone H1  
and green fluorescent protein to distinguish nuclei (FREITAG *et al.*, 2004) and different fluorescent  
50 labels could be used to distinguish between different strains. While this approach is necessary  
for many functional studies, it requires imaging with a fluorescent microscope and counting of  
52 individual nuclei, which can be laborious in large evolution experiments. At the moment, a system  
to easily estimate competitive fitness of *N. crassa* comparable to the *ara* marker in *Escherichia coli*  
54 (LENSKI *et al.*, 1998) does not exist.

To address this lack of suitably marked strains, we constructed genetically marked strains of  
56 *N. crassa*, and developed a PCR-based method to assess marker frequency in a sample of conidia.  
We used a high resolution melting (HRM) assay to distinguish between the amplification products  
58 of marked and wild type strains. HRM is a method in which a real-time PCR machine is used to  
monitor melting of PCR products. A fluorescent dye that binds double stranded DNA is included;  
60 when temperature increases, melting of the PCR products is monitored as the decrease in fluo-  
rescence caused by DNA strand separation. Sequence differences between different alleles cause  
62 their melting curves to differ, which can be used to distinguish them (WITTEWER *et al.*, 2003). By  
comparing unknown samples to known standards, the relative proportions of the different alleles  
64 can be determined. However, as with any other biochemical assay based on standard curves, there  
is some uncertainty associated with the standard curve and the samples. Therefore, we suggest a  
66 Bayesian statistical model to estimate fitness effects from competition experiments which incor-  
porates all the uncertainty associated with our measurements. HRM has been previously used in  
68 several different applications, including genotyping (WITTEWER *et al.*, 2003), identification of dif-  
ferent fungal species (ARANCIA *et al.*, 2011), methylation analysis (WOJDACZ and DOBROVIC,  
70 2007), and quantification of relative amounts of different bacterial strains in a sample to study  
competition (ASHRAFI *et al.*, 2017).

72 We show that our marked strain can be used in competition experiments, and that the HRM  
assay discriminates between the marked and the wild type strains. We further demonstrate that  
74 the marker itself does not have any large fitness effect and illustrate the utility of our method by  
estimating competitive fitness effects for the different mating type idiomorphs, and for a mutant in  
76 the RNA interference pathway, *qde-2*.

## Materials and methods

### 78 *Neurospora crassa* strains and culture methods

We used the nearly isogenic laboratory strains FGSC 2489 and 4200, obtained from the Fungal  
80 Genetics Stock Center (MCCLUSKEY *et al.*, 2010), to generate a uniform genetic background. We  
backcrossed 4200 to 2489, always picking *mat a* offspring. Previously, we had performed five  
82 backcross generations (KRONHOLM *et al.*, 2016), and now we performed further backcrosses until  
generation nine (BC<sub>9</sub>). From BC<sub>9</sub> offspring we picked *mat A* and *mat a* genotypes to obtain BC<sub>9</sub>  
84 2489 *mat A* and BC<sub>9</sub> 2489 *mat a*. Same backcrossing was done for *qde-2* mutant to obtain BC<sub>9</sub>  
2489 *mat A*;  $\Delta qde-2$  and BC<sub>9</sub> 2489 *mat a*;  $\Delta qde-2$ . All strains used in this study, including the  
86 marked strains described below, are shown in Table 1. Hereafter we will refer to the BC<sub>9</sub> 2489  
background simply as 2489.

88 We used standard laboratory protocols to culture *N. crassa* (DAVIS and DE SERRES, 1970).  
Growth medium was Vogel's medium N (METZENBERG, 2003) with 1.5% agar. Strains were  
90 grown in Lab companion ILP-02/12 (Jeio Tech, South Korea) growth chambers at 25 °C unless  
otherwise noted.

### 92 Construction of marked strains

Mutations in the *csr-1* gene cause resistance to the drug cyclosporin A (BARDIYA and SHIU,  
94 2007). This allows the use of homologous recombination in *N. crassa* strains without disabled  
non-homologous end-joining DNA repair pathway (NINOMIYA *et al.*, 2004).

Table 1: Strains used in this study. Strain ID shows either FGSC ID number or identifier. Strains with genotype BC<sub>9</sub> 2489 have the same genetic background generated by backcrossing 4200 nine times to 2489. FGSC = Fungal Genetics Stock Center, *wt* = wild type.

| Strain ID | Genotype                                         | Source     |
|-----------|--------------------------------------------------|------------|
| 2489      | <i>wt mat A</i>                                  | FGSC       |
| 4200      | <i>wt mat a</i>                                  | FGSC       |
| K13       | BC <sub>9</sub> 2489 <i>mat A</i>                | This study |
| K14       | BC <sub>9</sub> 2489 <i>mat a</i>                | This study |
| K15       | BC <sub>9</sub> 2489 <i>mat A csr-1*</i>         | This study |
| K16       | BC <sub>9</sub> 2489 <i>mat a csr-1*</i>         | This study |
| K17       | BC <sub>9</sub> 2489 <i>mat A; Δqde-2</i>        | This study |
| K18       | BC <sub>9</sub> 2489 <i>mat a; Δqde-2</i>        | This study |
| K19       | BC <sub>9</sub> 2489 <i>mat A csr-1*; Δqde-2</i> | This study |
| K20       | BC <sub>9</sub> 2489 <i>mat a csr-1*; Δqde-2</i> | This study |

## 96 Making the *csr-1\** construct

The overall strategy for making the construct used for transformation by PCR-stitching is illustrated in Figure 1. We made a linear construct that was homologous to *csr-1*, except that it contained a modified sequence (ATCCGAATTCATGTAATAGTGT), which introduces an EcoRI restriction site (GAATTC), two early stop codons, TAA and TAG, and single base pair deletion causing a frameshift (Figure 1). The *csr-1* gene is on chromosome 1, between coordinates 7403946–7406381 on the reverse strand, while the modified sequence is located between coordinates 7405193–7405212 (*N. crassa* genome assembly NC12). We modified this part of the *csr-1* sequence because the ATG it contains is the initiation codon for the cytosolic isoform of the protein. A mitochondrial isoform is initiated from an alternative start upstream, and we wanted to abolish the function of *csr-1* completely.

To make the construct, we amplified two flanking 1 kb regions with primers such that one of the primers contained a tail with the new modified sequence and a region that was homologous to the other PCR-product (Figure 1). We used primers *csrL-f* and *csrL-r* to amplify the left flanking region and primers *csrR-f* and *csrR-r* to amplify the right flanking region (all primer sequences are given in Table S1). These products were amplified with the Phusion DNA polymerase (Thermo Scientific) in a 50 μl PCR reaction containing: 1 × HF-buffer, 0.2 mM each dNTP, 0.25 μM each

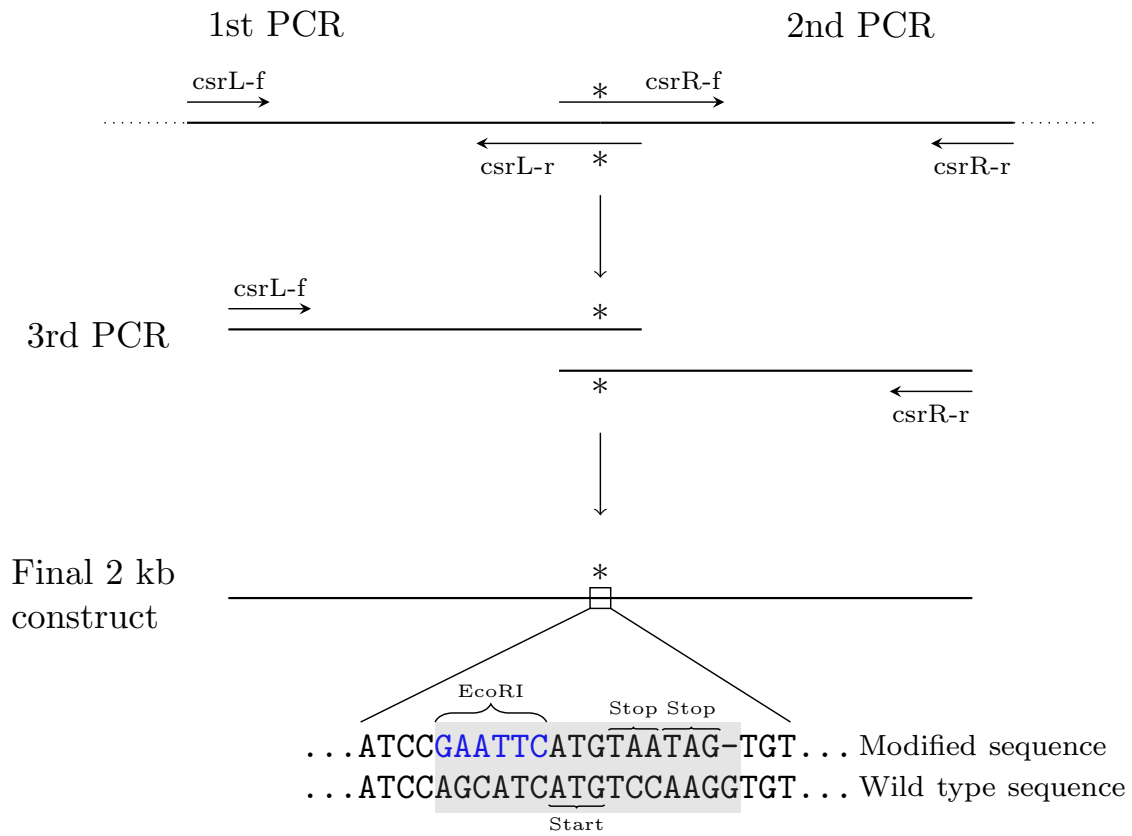

Figure 1: Overall strategy for generating the final construct by PCR-stitching. Primer names correspond to names in table S1.



primer, 100 ng of DNA, and 0.4 U of Phusion DNA polymerase. Reaction conditions for both  
114 reactions were: 1 min at 98 °C, then 30 cycles of 98 °C for 10 s, 60 °C for 30 s, 72 °C for 30 s, and  
a final extension at 72 °C for 5 min. PCR reactions were loaded on a 0.8% agarose gel and the 1  
116 kb bands were extracted from the gel, and cleaned using GenCatch gel extraction kit (Epoch Life  
Science) according to the manufacturer's instructions.

118 The final stitching PCR was performed using primers *csrL-f* and *csrR-r* with LA Taq polymerase  
(Takara) in a 50 µl reaction. The reaction contained: 1× LA PCR buffer, 0.4 mM each dNTP, 2 µl  
120 of both *csrL* and *csrR* templates, 0.2 µM each primer, and 25 U of LA Taq. Reaction conditions  
were: 94 °C for 1 min, followed by 35 cycles of 98 °C 10 s, 68 °C 5 min, and final extension at  
122 72 °C for 10 min. The PCR reaction was loaded on a 0.8% agarose gel, and the 2 kb band was  
extracted and purified as described above.

## 124 Transformation

We transformed the strain BC<sub>9</sub> 2489 *mat A* by electroporation following MARGOLIN *et al.* (1997).  
126 For electroporation, we mixed 200 ng of the construct and 40 µl of electrocompetent conidia in a  
chilled electroporation cuvette (2 mm gap), incubated on ice for 5 min, and electroporated with  
128 settings of: 600 Ω, 25 µF, and 1.5 kV. Immediately after electroporation 950 µl of ice cold 1 M  
sorbitol was added to the cuvette and mixed.

130 Electroporated conidia were then transferred to a 50 ml conical tube with 9 ml of 32 °C liquid  
medium without sucrose, and incubated with shaking for 2 h at 32 °C. After the incubation, 10  
132 ml of molten 2×top-agar (standard growth medium with 2% agar, 2 M sorbitol, and 10 µg/ml  
cyclosporin A) was added to the culture and poured immediately on to selective medium (normal  
134 growth medium with 1.5% agar and 5 µg/ml cyclosporin A). Cyclosporin A was dissolved in EtOH  
and added after autoclaving. Plates were incubated until colonies were visible, which were then  
136 picked and kept on slants.

## Validation of strains

138 To confirm transformants, we screened candidates by PCR with *csrL-f* and *csrR-r* primers and  
EcoRI digestion to identify strains containing the modified sequence. We grew mycelia for each  
140 of the colonies in a 5 ml liquid culture for 2 days in shaking at 32 °C and harvested the mycelium,  
tissue was then lyophilized and pulverized. Then we extracted DNA by a protocol adapted from  
142 OAKLEY *et al.* (1987). The original protocol was changed so that 1 ml of TCA/EtOH was used,  
and precipitation was done at −20 °C for 1 h. In addition after incubation with RNase A solution  
144 (containing 0.15 mg/ml RNase A), samples were extracted once with chloroform: 200 µl of chlo-  
roform was added, samples were vortexed, and centrifuged for 5 min at 14 000 rpm. Supernatant  
146 was transferred to a new tube, and 900 µL of 8:1 isopropanol:7.5 M NH<sub>4</sub>OAc solution was added.  
Samples were mixed and centrifuges for 1 min, and supernatant was discarded. Pellet was washed  
148 once with 70% ethanol and air dried, and then resuspended in TE-buffer. 25 µl PCR reactions  
were performed using Phusion DNA polymerase as above with primers *csrL-f* and *csrR-r*. Cultures  
150 whose PCR product was digested with EcoRI were kept for further analysis. Sanger sequencing of  
positive transformants was done using standard protocols.

152 A positive transformant, 2489 *mat A csr-I\**, was crossed to strain 2489 *mat a* to obtain 2489 *mat*  
*a csr-I\**. Then 2489 *mat A; Δqde-2* was crossed to 2489 *mat a csr-I\** to obtain genotypes that were  
154 *csr-I\**; *Δqde-2* for both mating type idiomorphs. Progeny were screened by PCR using the high  
resolution melting assay for *csr-I* and PCR-protocol for *mat* locus and *qde-2* as in KRONHOLM  
156 *et al.* (2016).

## High resolution melting PCR

158 A high resolution melting (HRM) PCR assay of the *csr-I* gene was developed using primers (*csr-*  
*hrm-f* and *csr-hrm-r*, Table S1) that amplified a 100 bp PCR product containing the modified se-  
160 quence. We amplified the product in 10 µl reactions containing 1×Precision melt supermix (Bio-  
Rad), 200 nM of each primer, and 2 µl of DNA. Sanger sequencing of the PCR product with primers  
162 *csr-hrm-f* and *csr-hrm-r* confirmed that the correct target was amplified. For HRM analysis, DNA

was extracted by combining 40  $\mu$ l of conidial suspension and 10  $\mu$ l of extraction buffer (100 parts  
164 of 50 mM Tris pH 8 and two parts of 0.5 M EDTA pH 8.5) and incubating the mixture for 10 min  
at 98 °C in a PCR machine as in KRONHOLM *et al.* (2016). Same batch of buffer was used for  
166 all samples. PCR amplification was performed with a Bio-Rad CFX-96 Real-Time System PCR  
machine. The reaction conditions were: initial denaturation of 95 °C for 2 min, 40 cycles of 95 °C  
168 for 10 s, 60 °C for 30 s, and 72 °C for 30 s. Amplification was followed by a melting curve analysis:  
initial denaturation phase of 95 °C for 30 s and renaturation at 70 °C for 1 min, followed by a melt  
170 curve measurement from 70–90 °C by 0.1 °C intervals for 5 s. Fluorescence was monitored on the  
SYBR channel.

172 To construct standard curves for conidial mixtures that contained different known proportions of  
*csr-I\** conidia, we grew the strains 2489 *mat A csr-I\**, 2489 *mat a csr-I\**, 2489 *mat A*, and 2489 *mat*  
174 *a* for 5 days on slants, and suspended the conidia in 1 ml of 0.01% Tween-80. We then measured  
conidial concentrations using a CASY TT cell counter (Roche) with a 45  $\mu$ m capillary and a gating  
176 size range from 2.5  $\mu$ m to 10  $\mu$ m. We standardized concentrations to 10<sup>8</sup> conidia/ml and combined  
different proportions of *csr-I*<sup>+</sup> and *csr-I\** conidia in 40  $\mu$ l samples with proportions of *csr-I\**  
178 conidia ranging from 1 to 0 by 0.1 decrements. We also tested a dilution series of conidia (from  
10<sup>8</sup> to 10<sup>4</sup> conidia/ml) to assess the effect of starting concentration on HRM results. Competition  
180 experiment samples were run on 96-well PCR plates. To control for variation in PCR reaction  
conditions, we included two independently constructed standard curves on each plate, a no template  
182 control, and additional controls of pure *csr-I*<sup>+</sup> and *csr-I\** conidia.

## Competition experiments

### 184 Effect of mating type and *csr-I\**

The first competition experiment had a full factorial design, in terms of *mat A*, *mat a*, *csr-I*<sup>+</sup>, and  
186 *csr-I\**, giving four strain combinations. We measured conidial concentrations as above, and stan-  
dardized concentrations to 1  $\times$  10<sup>7</sup> conidia/ml. The experiment was started with 10<sup>5</sup> conidia of both  
188 strains in a 75  $\times$  25 mm test tube containing 1 ml of slanted agar medium. Each competition had

five replicate populations, giving a total of 20 populations. Strains in the competition experiments  
190 were transferred every four or five days for three transfers. For a transfer, the conidia produced in a  
tube were suspended in 1 ml of 0.01% Tween-80 and 50  $\mu$ l of conidial suspensions were transferred  
192 to new tubes. At each transfer, 40  $\mu$ l of conidial suspension was taken for DNA extraction.

### **Fitness effect of the *qde-2* mutation**

194 In the second competition experiment we used four strain combinations, so that only strains with  
different mating types were competed and competing strains always differed from each other with  
196 respect to the other loci. Five replicate populations for each different strain combination were used,  
giving 20 populations in total. Competitions were performed as described above, but at 35 °C.

### **Statistical analyses**

All statistical analysis and data processing were done using the R environment version 3.5.2 (R  
200 CORE TEAM, 2018). For Bayesian analyses we used the Stan language (CARPENTER *et al.*, 2017),  
that implements adaptive Hamiltonian Monte Carlo sampling. Stan was interfaced by the R package  
202 'rethinking' (MCELREATH, 2015). For plotting we used the 'ggplot2' R package (WICKHAM,  
2016).

### **Estimation of *csr-1\** allele proportion**

To process the melting curve data, we followed the approach used by ASHRAFI *et al.* (2017) with  
206 some modifications. We first normalized the fluorescence data (RFU) between 0 and 1. The melting  
temperature for a given sample, i.e. temperature of the inflection point of its melting curve, was  
208 found based on the maximum of the spline interpolation of the negative first derivative of the  
melting curve. We also calculated the difference curve for the normalized RFU data, we subtracted  
210 RFU of the positive control of *csr-1\** from the RFU of each sample. For further analysis using the  
normalized RFU differences, we used the temperature that gave the maximal differences between  
212 standard curve samples.

To estimate the proportion of conidia that contain the *csr-I\** allele, we first built a standard  
214 curve and then estimated the proportion in unknown samples using this curve. For estimating the  
standard curve, we used the approach recommended by ASHRAFI *et al.* (2017): the model was  
216  $y = a + Bx$ , where  $y$  was the RFU difference or melting temperature and  $x$  was the proportion of  
*csr-I\**, where  $x$  for unknown samples is estimated from

$$218 \quad x = \frac{y - a}{B} \quad (1)$$

instead of fitting the proportion directly as a response. This allows fitting a normal distribution for  
220 the RFU difference or melting temperature, whereas proportion is constrained between 0 and 1.  
Thus, the Bayesian model for standard curve was:

$$\begin{aligned} y_i &\sim N(\mu_i, \sigma) & (2) \\ \mu_i &= a + Bx_i \\ a, B &\sim N(0, 10) \\ \sigma &\sim \text{hC}(0, 2) \end{aligned}$$

222 where  $y_i$  was the  $i$ th observation of normalized RFU difference,  $x_i$  is the  $i$ th *csr-I\** allele pro-  
portion,  $a$  is the intercept, and  $B$  is the slope of the standard curve. We used weakly regularizing  
224 (MCELREATH, 2015) gaussian priors for  $a$  and  $B$ , and half-cauchy (hC) prior for the standard de-  
viation  $\sigma$ . For MCMC estimation we used two chains, with warmup set to 1000 followed by 3000  
226 iterations for sampling. Convergence of the model was examined by using trace plots and  $\hat{R}$  values,  
which were 1 for all estimated parameters. Proportion of unknown samples was estimated by using  
228 the posterior distributions for  $a$  and  $B$  and substituting them to equation 1. The values for propor-  
tion that were  $< 0$  or  $> 1$  were set to their limits. This way we obtained a posterior distribution for  
230 the *csr-I\** allele proportion for each unknown sample.

## Estimation of competitive fitness

232 Competitive fitness in haploid asexually reproducing organisms is just the ratio of growth rates of  
the competing types. Let  $N$  be population size,  $r$  growth rate, and  $t$  time, then population growth  
234 can be modeled as  $N_t = (1+r)^t N_0$ . If we have two competing types:  $A$  and  $B$ , then the proportions  
of these types grow as

$$236 \quad \frac{A_t}{B_t} = \left( \frac{1+r_A}{1+r_B} \right)^t \frac{A_0}{B_0} = W_{AB}^t \left( \frac{A_0}{B_0} \right) \quad (3)$$

where  $W_{AB}$  is the fitness of type  $A$  relative to  $B$ . Taking a logarithm from equation 3 and substi-  
238 tuting  $B = 1 - A$  yields

$$\log \left( \frac{A_t}{1 - A_t} \right) = \log \left( \frac{A_0}{1 - A_0} \right) + \log(W_{AB}) \times t. \quad (4)$$

240 From this equation, we note that if we plot log-proportion of the two types against time, then  
 $\log(W)$  is the slope of this line. This is the standard way to estimate competitive fitness in asexuals  
242 (HARTL and CLARK, 1997), and has been used extensively in the experimental evolution literature  
(LENSKI *et al.*, 1991). For *N. crassa*, this estimate works when strains are only allowed to repro-  
244 duce asexually. We substitute the number of transfers for number of generations here; therefore,  
our fitness estimates include effects of mycelial growth rates and conidial production in as many  
246 cell divisions as it takes to go from spore to spore.

We included uncertainty in the *csr-I\** allele proportion estimates in the model to estimate com-  
248 petitive fitness by using the observed posterior standard deviations for each *csr-I\** allele proportion  
observation in the model (MCELREATH, 2015). To estimate relative fitnesses for the mating type  
250 and the *csr-I\** allele, we fitted a model that accounted for competition, population effects, effect of

mating type, and the *csr-I\** allele:

$$\begin{aligned}x_{est,i} &\sim N(\mu_i, \sigma) \\ \log\left(\frac{\mu_i}{1 - \mu_i}\right) &= \alpha_{comp[i]} + (\beta_{pop[i]} + \beta_{csr} + \beta_{matA} \times m_i) \times t_i \\ x_{obs,i} &\sim N(x_{est,i}, x_{sd,i}) \\ \alpha_{comp[i]} &\sim N(0, 0.065) \\ \beta_{pop[i]} &\sim N(0, 1) \\ \beta_{csr}, \beta_{matA} &\sim N(0, 1) \\ \sigma &\sim \text{hC}(0, 2)\end{aligned}\tag{5}$$

252 where  $x_{obs,i}$  is the  $i$ th observed *csr-I\** allele proportion,  $x_{sd,i}$  is the observed error term for  $i$ th obser-  
253 vation,  $x_{est,i}$  is the estimated proportion for  $i$ th observation,  $\alpha_{comp[i]}$  is the intercept effect for each  
254 competition (four competitions),  $\beta_{pop[i]}$  the slope effect of a replicate population (20 populations),  
 $\beta_{csr}$  is the effect of the *csr-I\** allele,  $\beta_{matA}$  is the effect of mating type A,  $m_i$  is an indicator whether  
255 in  $i$ th observation the *csr-I\** allele containing strain is mating type A,  $t_i$  is the transfer number for  
 $i$ th observation, and  $\sigma$  is the error standard deviation. Because these are competition experiments,  
256 where always two strains are competing, all the slope effects are relative effects, e.g.  $\beta_{matA}$  is the  
257 fitness effect of *mat A* relative to *mat a*. Therefore, the indicator  $m_i \in \{-1, 0, 1\}$ , so that  $m_i = 1$   
258 when *csr-I\** allele containing strain is *mat A*,  $m_i = -1$  when *csr-I\** allele containing strain is *mat*  
259 *a*, and  $m_i = 0$  when mating types are identical. This way we can use all information in the data  
260 to estimate the effect of *mat A* from all competitions. We used weakly regularizing priors for the  $\beta$   
261 slope effects, and an informative prior for the intercept,  $\alpha$ . Since we started the competition with  
262 spores of both strains at a frequency of 0.5, it makes sense to restrict intercept close to this value  
263 (0.5 is 0 on a logistic scale). The response of the model was fitted on the logistic scale, as at this  
264 scale relative fitness is the logarithm of the slope of this model, thus  $W = \exp(\beta)$  for a given effect  
265 (Equation 4). MCMC estimation was done as above, but with 5000 iterations in total. Relative  
266 fitness of *mat A* and *csr-I\** was calculated from posterior distributions of corresponding  $\beta$  effects.

When estimating the effect of the *qde-2* mutation, we first transformed the data such that the  
270 response indicated the frequency of the strain with the *qde-2* mutation and not necessarily the strain  
with the *csr-1\** allele. The deterministic part of the model was:

$$272 \quad \log\left(\frac{\mu_i}{1 - \mu_i}\right) = \alpha_{comp[i]} + (\beta_{pop[i]} + \beta_{qde-2} + \beta_{csr} \times c_i + \beta_{matA} \times m_i) \times t_i \quad (6)$$

where  $\beta_{qde-2}$  is the effect of the *qde-2* mutation,  $\beta_{csr}$  is the effect of the *csr-1\** allele,  $c_i$  is an  
274 indicator variable whether in  $i$ th observation the *qde-2* strain has the *csr-1\** allele,  $c_i \in \{-1, 1\}$ ,  
 $\beta_{matA}$  is the effect of mating type A, and  $m_i$  is an indicator variable whether in  $i$ th observation  
276 the *qde-2* strain is mating type A,  $m_i \in \{-1, 1\}$ . Neither the *csr-1\** nor the mating type effect are  
ever absent; they are just present in different configurations in the different competitions. Other  
278 parameters, priors, and MCMC estimation were the same as above.

Since the two competition experiments have slightly different designs, but we wanted to use all  
280 possible information when estimating fitness effects for *mat A* and *csr-1\**, we also combined their  
estimates from the two experiments meta-analytically. We used a model:

$$y_i \sim N(\mu_i, y_{sd,i}) \quad (7)$$

$$\mu_i = \alpha$$

$$\alpha \sim N(0, 1)$$

282 where  $y_i$  is the effect estimate,  $y_{sd,i}$  is the observed error, and  $\alpha$  is the meta-analytical estimate.

Since there were only two experiments, we did not fit a term for experimental variation. Model was  
284 fit using the package 'brms' (BÜRKNER, 2017) with MCMC estimation as above, but with 4000  
iterations in total.

## 286 **Data availability**

Strains will be available from the Fungal Genetics Stock Center (accession numbers pending). The  
288 data and scripts implementing all statistical analyses are available from the University of Jyväskylä



Digital Repository: <https://doi.org/10.17011/jyx/dataset/65035>

## 290 **Results**

### **Construction of marked strains**

292 To introduce a marker to differentiate the strains in competition experiments, we modified the *csr-I* gene (ID: NCU00726) by homologous recombination. Rendering *csr-I* non-functional allows  
294 screening for positive transformants and distinguishing the strains by their *csr-I* sequences. After transformation we screened colonies for positive transformants; some of the colonies were het-  
296 erokaryotic, but we found a homokaryotic transformant as well. We designated the new modified allele as *csr-I\**. We subsequently validated the strains by Sanger sequencing, and observed the  
298 expected new *csr-I\** and wild type *csr-I<sup>+</sup>* sequences in a positive transformant and the wild type, respectively. We crossed the *csr-I\** marker to different genotypes to have strains with both mating  
300 types and in the *qde-2* mutant background (Table 1).

### **HRM assay optimization**

302 To estimate the proportions of marked and unmarked conidia, we developed an HRM assay for the *csr-I* gene. We made mixtures with different proportions of *csr-I<sup>+</sup>* and *csr-I\** conidia. We could  
304 distinguish samples containing different proportions of the two *csr* alleles based on their melting curves (Figure 2A). The calculated melting temperatures were 81 and 82.1 °C for the *csr-I\** and  
306 wild type alleles, respectively. However, for the 50% mixture, the melting temperature in our assays was 81.9 °C, which is not the midpoint between these two temperatures (Figure 2B). The alleles  
308 investigated here have multiple changes, so formation of heteroduplex DNA has likely a large effect on melting curve shape. Attempts to make standard curves with the melting temperature also  
310 yielded unsatisfactory results. Therefore, we used the difference in the normalized RFU instead (Figure 2C), picking the temperature where the difference between proportions of 0 and 1 were  
312 maximized to have the highest dynamic range. Using the normalized difference, we obtained good

separation of the different proportions and a linear standard curve (Figure 2D).

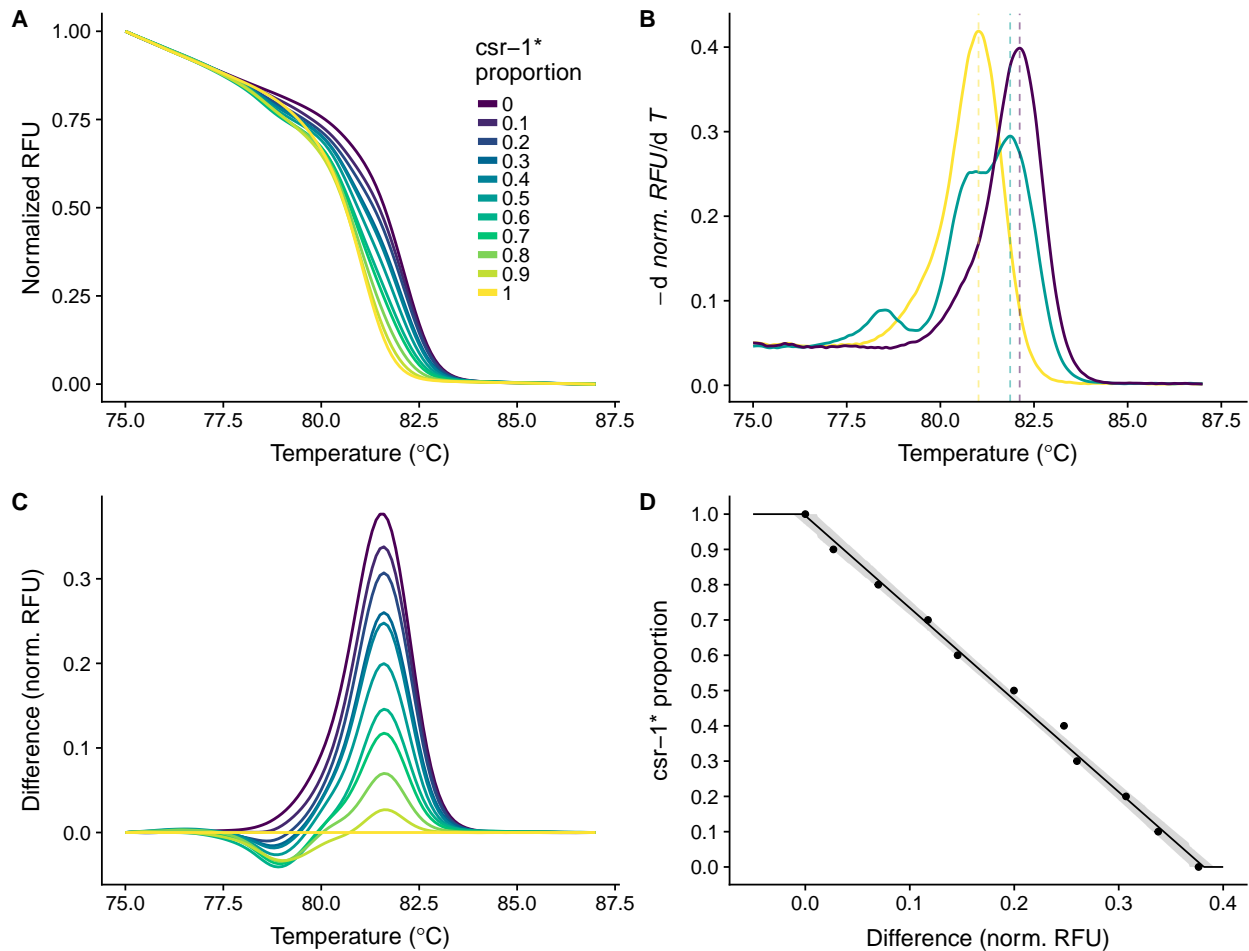

Figure 2: A) Melting curves of samples with different mixtures of *csr-1<sup>+</sup>* and *csr-1\** conidia. Normalized fluorescence against temperature. B) Melting temperature, i.e. the inflection point of the melting curve, can be found at the maximum of the negative first derivative of normalized RFU. Negative derivative against temperature for samples with *csr-1\** proportions of 1, 0.5, and 0. C) Difference curves for the melting curves in panel A, relative to *csr-1\**. D) Standard curve for *csr-1\** allele proportion in the sample and normalized RFU difference.

314 To assess the efficiency of the PCR reaction, we tested the effect of the number of conidia  
in DNA extractions on the real-time PCR reaction. We observed that  $C_q$  value decreased with  
316 increasing numbers of conidia in the DNA extraction (Figure S1). The slope of this relationship  
was  $-1.9$  when using  $\log_{10}$  transformed number of conidia, and no significant differences were  
318 observed for the two alleles; the alleles amplified with similar efficiency. There are likely some  
PCR inhibitors in the conidial DNA extraction as the slope is  $> -3.3$ . However, this is unlikely to

320 be a problem, since we are not interested in absolute quantification but we are interested in relative  
proportions always in one sample. Furthermore, the  $C_q$  values of competition experiment (see  
322 below) samples were similar; for the first competition experiment mean  $C_q = 26.0$  and  $\sigma = 0.63$ ,  
and for the second competition experiment mean  $C_q = 25.8$  and  $\sigma = 2.35$ . The elevated standard  
324 deviation is due to a few samples having larger  $C_q$  values.

To summarize, the HRM assay allowed us to distinguish between  $csr-I^+$  and  $csr-I^*$  alleles  
326 and to estimate the proportion of these alleles in unknown samples using known proportions as a  
standard curve (Figure 2D).

## 328 **Competition experiments**

Having a marker system that distinguishes strains from one another enabled us to perform compe-  
330 tition experiments to estimate relative fitness of different genotypes. We inoculated two strains in  
one culture, and transferred conidia for three transfers and followed the strain frequencies using the  
332 HRM assay. This allowed us to estimate the relative fitness effects of different genotypes.

### **Effect of mating type and $csr-I^*$ allele**

334 In the first competition experiment, we tested the effect of the  $csr-I^*$  allele and the mating type  
of the strain. For the marker system to be useful, the marker itself should not have a large ef-  
336 fect on fitness. We were also interested in the fitness effect of the mating type. When *N. crassa*  
mycelium grows, some hyphae fuse to form an interconnected network, which allows nutrient  
338 exchange within the mycelium. *N. crassa* strains that share the same mating type and heterocom-  
patibility *het* alleles, such as the otherwise genetically identical strains used here, can fuse. Fusion  
340 is prevented for mycelia with different mating types (METZENBERG and GLASS, 1990). In our  
experiments, we observed that when strains shared the same mating type, and thus fused with each  
342 other, the frequency changes of the  $csr-I^*$  allele were much smaller than with opposite mating  
types (Figure 3). The  $csr-I^*$  allele had small frequency changes that seemed to go in both direc-  
344 tions when mating types were the same (Figure 3A), indicating that the allele has no large fitness

effects. However, when mating types were different, and thus hyphal fusion was not possible, competitive exclusion seemed to happen quickly (Figure 3A). For the 2489 *mat a csr-1\** vs. 2489 *mat A* competition, the marked strain won in two replicates while the unmarked strain won in three replicates (Figure 3A). In the 2489 *mat A csr-1\** vs. 2489 *mat a* competition, the 2489 *mat a* always won. Overall this results in a broad estimate for the *mat A* fitness effect:  $W_{matA} = 0.63$  (0.28–1.10, 95% HPDI) (Figure 3B). Since *mat A* strain won in some replicates in the other treatment, it seems likely that this is due to chance in a small sample of replicate populations. In the 2489 *mat A csr-1\** vs. 2489 *mat A* competition, frequency changes were small. However, in the 2489 *mat a csr-1\** vs. 2489 *mat a* competition there was an initial larger change in frequency after which the frequency changes were smaller (Figure 3A). The effect of *csr-1\** allele on fitness was negative but the estimate overlapped with 1:  $W_{csr} = 0.72$  (0.44–1.05, 95% HPDI). While the results suggest that there may be fitness effects, we cannot make final conclusions based on these results alone.

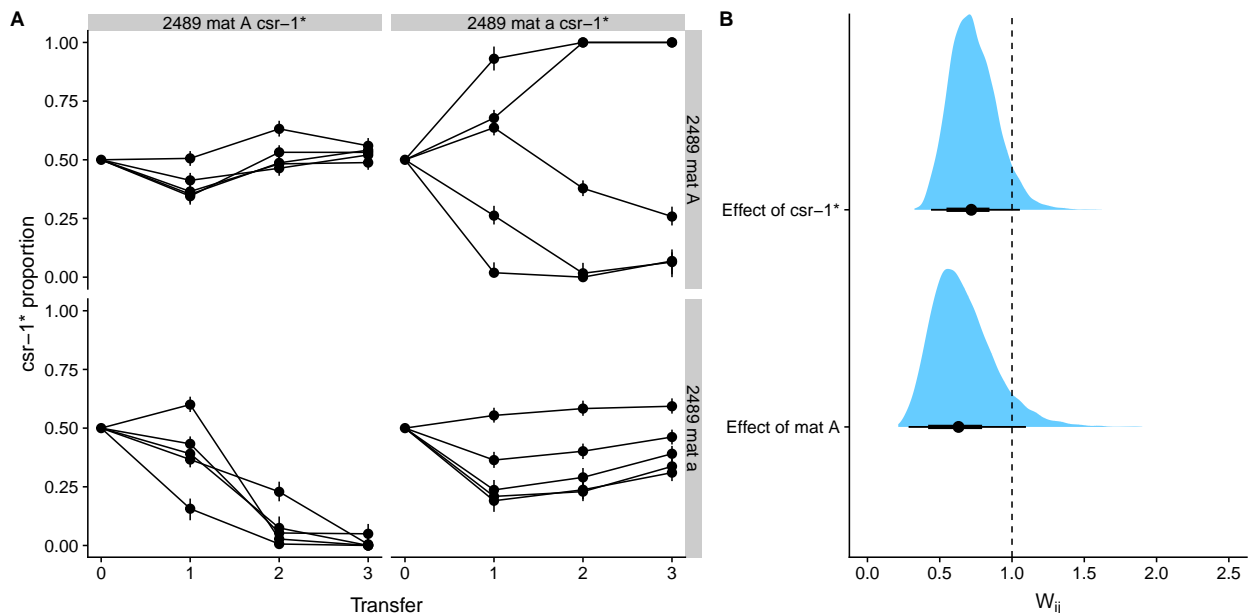

Figure 3: Results for the competition experiments testing the effect of the *csr-1\** allele and mating type. For each treatment,  $n = 5$  for a total of 20 populations. A) Frequency trajectories of the *csr-1\** allele. B) Estimates of competitive fitness. Dots show point estimates for relative fitness, thick lines show the 66% and thin lines the 95% HPDI interval and the whole posterior distribution filled above. The dashed vertical line shows relative fitness of one, i.e. no difference.

## Fitness effect of *qde-2* mutation

358 Next we estimated the fitness effect of the *qde-2* mutation with competition experiments. QDE-2  
(ID: NCU04730) is the *N. crassa* ARGONAUTE homolog and the corresponding mutant is defi-  
360 cient in small RNA processing (MAITI *et al.*, 2007; LEE *et al.*, 2010). We had previously examined  
the effect of *qde-2* on growth in different environments (KRONHOLM *et al.*, 2016), and observed  
362 that it grows slower than the wild type. Therefore we expected that *qde-2* would have a lower  
relative fitness. Indeed, we observed that the strain with the *qde-2* mutation generally decreased in  
364 frequency (Figure 4A). In the 2489 *mat A* vs. 2489 *mat a csr-1\**;  $\Delta qde-2$  competition there was one  
population where the frequency of the *csr-1\** allele initially decreased but then started to recover,  
366 this happened to a lesser extent for one population in the 2489 *mat A csr-1\**;  $\Delta qde-2$  vs. 2489 *mat*  
*a* competition as well (Figure 4A). The reason for this change of direction is unknown, one pos-  
368 sibly is that a new beneficial mutation occurred in the *qde-2* background. Nevertheless, the *qde-2*  
strain clearly has a lower relative fitness compared to wild type (Figure 4B); the fitness estimate for  
370 *qde-2* was 0.30 (0.17–0.46, 95% HPDI). In this experiment, *mat A* had again a suggestive effect:  
0.68 (0.41–1.04, 95% HPDI), but the estimate overlapped with one. However, if we combine the  
372 results of the two experiments meta-analytically the effect for *mat A* is different from one: 0.67  
(0.46–0.94, 95% HPDI). There was no indication that the *csr-1\** allele affected fitness in either this  
374 experiment (Figure 4B). When estimates were combined the effect of *csr-1\** was 0.87 (0.64–1.18  
95% HPDI). Together with results from the other competition experiment, *mat A* has a lower fitness  
376 than *mat a*, but importantly, the *csr-1\** allele had no detectable effect on fitness.

## Discussion

378 We showed that the *csr-1\** allele can be used as a marker in competition experiments. The biological  
function of *csr-1* is not known, other than giving sensitivity to cyclosporin (BARDIYA and SHIU,  
380 2007). As the *csr-1\** is a nonfunctional allele of *csr-1*, the marker could potentially have some effect  
on fitness. However, both potential effect of the marker and a genotype of interest can be estimated

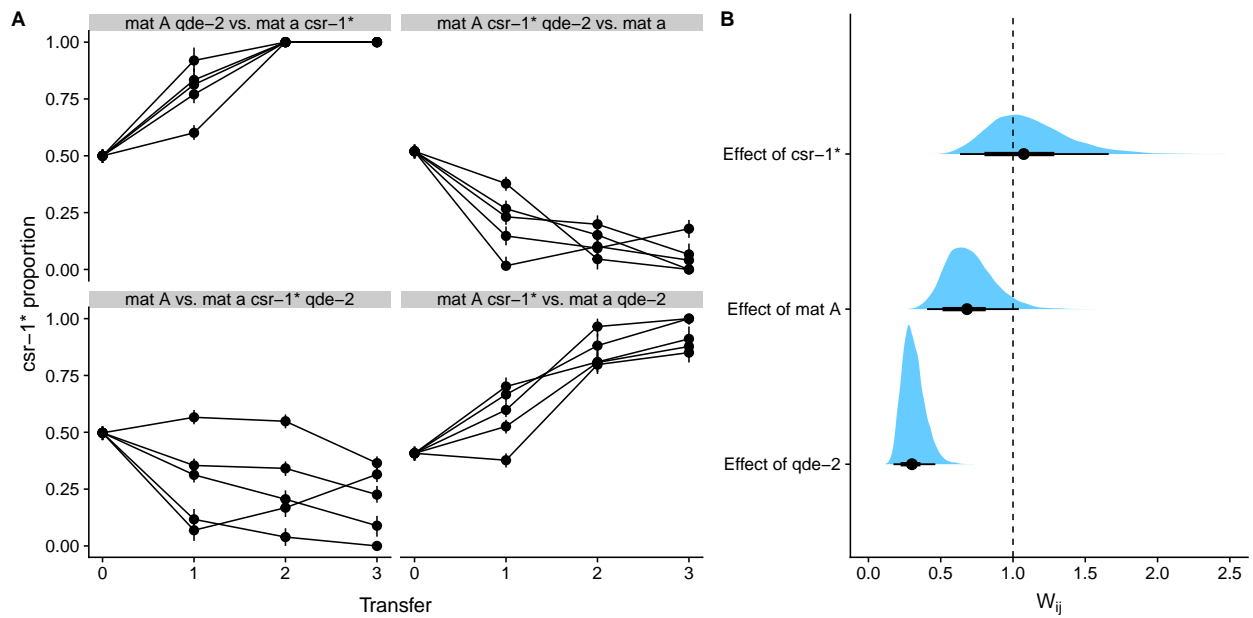

Figure 4: Results of competition experiments testing the effect of *qde-2* mutation. For each treatment,  $n = 5$  for a total of 20 populations. A) Frequency trajectories of the *csr-1\** allele. B) Estimates of competitive fitness effects for *qde-2* mutation relative to wild type, mating type A relative to mating type a, and *csr-1\** relative to *csr-1*<sup>+</sup>. Dots show point estimates for relative fitness, thick lines show the 66% and thin lines the 95% HPDI interval. The dashed vertical line shows relative fitness of one, i.e. no difference.

382 separately if the experimental design includes swapping the marker between the competing strains  
as done here. If swapping experiments are not possible, the known effect of the marker could  
384 be included in the model via priors. We detected no effect of *csr-1\** on fitness in the laboratory  
environment used here, so the *csr-1\** allele seems to be suitable as a marker for quantification of  
386 competitive fitness in *N. crassa*.

We also observed that when the two strains had the same mating type, the *csr-1\** allele fre-  
388 quency changed only slowly or was maintained close to 0.5, but when strains of two different  
mating types were competing there seemed to be competitive exclusion of one of the strains. In  
390 *N. crassa*, genetically compatible strains undergo hyphal fusion only between strains that have the  
same mating type and compatible allorecognition alleles (METZENBERG and GLASS, 1990; ZHAO  
392 *et al.*, 2015). Since our strains are nearly isogenic, they can undergo hyphal fusion and form a  
heterokaryotic mycelium with respect to the *csr-1* locus, maintaining both alleles. This is what  
394 likely happened in competitions of strains with the same mating type. Nuclear ratios in *N. crassa*  
heterokaryons seem to be determined at the establishment phase of the heterokaryon, and the ratio  
396 of nuclei can be rather stable afterwards (ATWOOD and MUKAI, 1955; PITTENGER and ATWOOD,  
1956). Frequency changes of different nuclei apparently require that the nuclei have different rates  
398 of mitosis, as diffusible components seem to be shared within the mycelium (PITTENGER and AT-  
WOOD, 1956). In the related species *N. tetrasperma*, which has a pseudohomothallic mating sys-  
400 tem, there is some evidence that the different nuclei are maintained by active processes (SAMILS  
*et al.*, 2014). Furthermore, in the basidiomycete *Heterobasidion parviporum* ratios of different  
402 nuclei are affected by genetic and environmental effects (JAMES *et al.*, 2008).

In contrast, when strains with different mating types were competing, there seemed to be com-  
404 petitive exclusion, in which one strain often came to dominate the culture. When strains with  
different mating types fuse, cell death occurs in the fused cells, and these strains are thus unable  
406 to form heterokaryons (METZENBERG and GLASS, 1990), and competition must happen. Based  
on theoretical modeling of fungal fitness for a filamentous fungus life cycle in a system of many  
408 habitable patches, competitive exclusion between different strains is inevitable (GILCHRIST *et al.*,

2006). In our experiments, the strains were competing only for a single patch. In the laboratory,  
410 *N. crassa* seems to follow a bang-bang life history strategy (GILCHRIST *et al.*, 2006), where the  
mycelium first grows to cover nearby habitable area and then the fungus switches to spore produc-  
412 tion. Hence, our strains may be competing mainly for space in the culture tube. In some populations  
of the mating type and *csr-1\** allele experiments, the mating type A seemed to win even if overall  
414 *mat a* had a higher fitness. In these cases, it may be that *mat A* gained some initial advantage due  
to chance, and thus gained an advantage by simply having more spores in the next transfer. During  
416 *N. crassa* spore germination as spore fusion increases growth (RICHARD *et al.*, 2012), a strain with  
more spores and thus more potential fusion partners may have an initial advantage even if its steady  
418 state growth rate of mature mycelium is slightly slower.

Surprisingly, when we combined information across experiments, we observed a fitness effect  
420 for the mating type locus with *mat a* having a higher relative fitness than *mat A*. In a facultative  
sexual species such as *N. crassa* both mating types have to be maintained in a population for sexual  
422 reproduction to occur; so it seems unexpected that one mating type has a higher asexual fitness than  
the other. However, it has been reported previously that in *N. crassa* *mat a* has a higher growth rate  
424 than *mat A* (RYAN *et al.*, 1943). Different mating types have been reported to have different growth  
rates also in other species: including *N. tetrasperma* (SAMILS *et al.*, 2014), *Pleurotus ostreatus*  
426 (LARRAYA *et al.*, 2001), and *Fusarium culmorum* (IRZYKOWSKA *et al.*, 2013). Considering that  
mating types can have differential fitness, how are they maintained in natural populations? One  
428 possibility is that the observed fitness advantage could be environmentally dependent, or alter-  
natively, that sexual reproduction occurs often enough that mating type frequencies approach the  
430 evolutionary stable ratio of 1:1 despite differences in asexual fitness.

The *qde-2* mutation was known to grow slower than the wild type at 35 °C (KRONHOLM *et al.*,  
432 2016), so the observation that it also has a lower competitive fitness is expected. Result showed  
that we can measure fitness effects of mutations with our marked strain system. The magnitude  
434 of the fitness effect is perhaps larger than expected: the growth rate of *qde-2* is 79% that of wild  
type at 35 °C (KRONHOLM *et al.*, 2016), while the relative fitness of *qde-2* was 30% that of wild



436 type. Thus, the relationship between mycelial growth rate and competitive fitness is not a simple  
one to one relationship. Similarly, large fitness effects, although with large uncertainty, were also  
438 observed for the *mat* locus. For example, the estimates seem large when compared to fitness effects  
of gene deletions in yeast (BELL, 2010). One possible explanation is that these estimates are not  
440 directly comparable as there is a large number of mitotic cell divisions between transfers, and one  
transfer from spore to spore in a filamentous fungus is not comparable to a cell division generation  
442 in unicellular yeasts or bacteria.

The *csr-I\** allele is a very versatile marker. In this study, we used HRM PCR as a method  
444 to detect the proportion of the *csr-I\** allele, but there are other methods to estimate *csr-I\** allele  
proportion in a sample of spores. The simplest, although more laborious, method is to do replica  
446 plating of spores on plates with and without cyclosporine. Other PCR-based methods besides HRM  
that can detect the sequence difference between the *csr-I* alleles could also be used to estimate the  
448 proportion of the *csr-I\**, such as digital droplet PCR with different probes (HINDSON *et al.*, 2011),  
pyrosequencing (HARRINGTON *et al.*, 2013), or any next generation sequencing technology, where  
450 many samples can be multiplexed with different barcodes and sequenced together (SMITH *et al.*,  
2010). The advantage of our method is that it only requires to set up conventional PCR reactions  
452 taking little bench time, and the whole process can be done in 96-well plates enabling moderate  
throughput.

454 Another advantage of our method is the Bayesian model employed. Standard curves are com-  
monly used in various biochemical assays, and while Bayesian approaches have been developed  
456 for various assays (GELMAN *et al.*, 2004; FENG *et al.*, 2010) they are rarely used in practise. Our  
model let's any uncertainty arising from the standard curve, the samples, or the initial inoculation  
458 via measuring proportion at transfer 0, to be propagated into the fitness estimates. Our modeling  
approach could also be used for other marker systems employing standard curves.

460 In conclusion, the marked strains reported here can be used to measure fitness effects of indi-  
vidual mutations or even for the fitness of strains derived by experimental evolution. They provide  
462 a versatile tool and advance the use of *N. crassa* as system studying experimental evolution and

ecology (LEE and DIGHTON, 2010; FISHER and LANG, 2016).

#### 464 **Acknowledgements**

This study was supported by the Academy of Finland grant no. 274769 to IK and no. 278751 to  
466 TK. KJM was supported by National Institutes of Health Training Grant: T32 HD007348. EUS  
was supported by NIH grants GM093061 and GM127142. We thank Matthieu Bruneaux, Roghaieh  
468 Ashrafi, and Neda Moghadam for comments on the manuscript.

## **References**

470 ANDERSON, J. L., B. P. S. NIEUWENHUIS, and H. JOHANNESSON, 2018 Asexual reproduction  
and growth rate: independent and plastic life history traits in *Neurospora crassa*. The ISME  
472 Journal **13**: 780–788.

ARANCIA, S., S. SANDINI, F. D. BERNARDIS, and D. FORTINI, 2011 Rapid, simple, and low-cost  
474 identification of *Candida* species using high-resolution melting analysis. Diagnostic Microbiol-  
ogy and Infectious Disease **69**: 283–285.

476 ASHRAFI, R., M. BRUNEAUX, L.-R. SUNDBERG, K. PULKKINEN, and T. KETOLA, 2017 Ap-  
plication of high resolution melting assay (HRM) to study temperature-dependent intraspecific  
478 competition in a pathogenic bacterium. Scientific Reports **7**: 980.

ATWOOD, K. C., and F. MUKAI, 1955 Nuclear distribution in conidia of *Neurospora* het-  
480 erokaryons. Genetics **40**: 438–443.

BARDIYA, N., and P. K. SHIU, 2007 Cyclosporin A-resistance based gene placement system for  
482 *Neurospora crassa*. Fungal Genetics and Biology **44**: 307–314.

BASTIAANS, E., A. J. M. DEBETS, and D. K. AANEN, 2016 Experimental evolution reveals that  
484 high relatedness protects multicellular cooperation from cheaters. Nat Commun **7**: 11435.

- BELL, G., 2010 Experimental genomics of fitness in yeast. *Proceedings of the Royal Society B: Biological Sciences* **277**: 1459–1467.  
486
- BÜRKNER, P.-C., 2017 brms: An R package for Bayesian multilevel models using Stan. *Journal of Statistical Software, Articles* **80**: 1–28.  
488
- CARPENTER, B., A. GELMAN, M. HOFFMAN, D. LEE, B. GOODRICH, *et al.*, 2017 Stan: A probabilistic programming language. *Journal of Statistical Software* **76**: 1–32.  
490
- COLOT, H. V., G. PARK, G. E. TURNER, C. RINGELBERG, C. M. CREW, *et al.*, 2006 A high-throughput gene knockout procedure for *Neurospora* reveals functions for multiple transcription factors. *Proceedings of the National Academy of Sciences* **103**: 10352–10357.  
492
- DAVIS, R. H., and F. J. DE SERRES, 1970 Genetic and microbiological research techniques for *Neurospora crassa*. *Methods in Enzymology* **17**: 79–143.  
494
- FENG, F., A. P. SALES, and T. B. KEPLER, 2010 A Bayesian approach for estimating calibration curves and unknown concentrations in immunoassays. *Bioinformatics* **27**: 707–712.  
496
- FISHER, K. J., and G. I. LANG, 2016 Experimental evolution in fungi: An untapped resource. *Fungal Genetics and Biology* **94**: 88–94.  
498
- FREITAG, M., P. C. HICKEY, N. B. RAJU, E. U. SELKER, and N. D. READ, 2004 GFP as a tool to analyze the organization, dynamics and function of nuclei and microtubules in *Neurospora crassa*. *Fungal Genetics and Biology* **41**: 897–910.  
500  
502
- GELMAN, A., G. L. CHEW, and M. SHNAIDMAN, 2004 Bayesian analysis of serial dilution assays. *Biometrics* **60**: 407–417.  
504
- GILCHRIST, M. A., D. L. SULSKY, and A. PRINGLE, 2006 Identifying fitness and optimal life-history strategies for an asexual filamentous fungus. *Evolution* **60**: 970–979.  
506

- GRAHAM, J. K., M. L. SMITH, and A. M. SIMONS, 2014 Experimental evolution of bet hedging  
508 under manipulated environmental uncertainty in *Neurospora crassa*. Proceedings of the Royal  
Society B: Biological Sciences **281**: 20140706.
- HARRINGTON, C. T., E. I. LIN, M. T. OLSON, and J. R. ESHLEMAN, 2013 Fundamentals  
510 of pyrosequencing. Archives of Pathology & Laboratory Medicine **137**: 1296–1303. PMID:  
512 23991743.
- HARTL, D. L., and A. G. CLARK, 1997 *Principles of Population Genetics*. Sinauer Associates,  
514 Inc., Sunderland, 3rd edition.
- HINDSON, B. J., K. D. NESS, D. A. MASQUELIER, P. BELGRADER, N. J. HEREDIA, *et al.*, 2011  
516 High-throughput droplet digital PCR system for absolute quantitation of DNA copy number.  
Analytical Chemistry **83**: 8604–8610. PMID: 22035192.
- IRZYKOWSKA, L., J. BOCIANOWSKI, and A. BATURO-CIEŚNIEWSKA, 2013 Association of  
518 mating-type with mycelium growth rate and genetic variability of *Fusarium culmorum*. Cen-  
tral European Journal of Biology **8**: 701–711.  
520
- JAMES, T. Y., J. STENLID, Å. OLSON, and H. JOHANNESSON, 2008 Evolutionary significance  
522 of imbalanced nuclear ratios within heterokaryons of the basidiomycete fungus *Heterobasidion*  
*Parviporum*. Evolution **62**: 2279–2296.
- KRONHOLM, I., H. JOHANNESSON, and T. KETOLA, 2016 Epigenetic control of phenotypic plas-  
524 ticity in the filamentous fungus *Neurospora crassa*. G3: Genes|Genomes|Genetics **6**: 4009–4022.
- LARRAYA, L. M., G. PÉREZ, I. IRIBARREN, J. A. BLANCO, M. ALFONSO, *et al.*, 2001 Relation-  
526 ship between monokaryotic growth rate and mating type in the edible basidiomycete *Pleurotus*  
*ostreatus*. Applied and Environmental Microbiology **67**: 3385–3390.  
528
- LEE, H.-C., L. LI, W. GU, Z. XUE, S. K. CROSTHWAITE, *et al.*, 2010 Diverse pathways generate  
530 microRNA-like RNAs and Dicer-independent small interfering RNAs in fungi. Molecular Cell  
**38**: 803–814.

- 532 LEE, K., and J. DIGHTON, 2010 *Neurospora*, a potential fungal organism for experimental and evolutionary ecology. *Fungal Biology Reviews* **24**: 85–89.
- 534 LENSKI, R. E., J. A. MONGOLD, P. D. SNIEGOWSKI, M. TRAVISANO, F. VASI, *et al.*, 1998 Evolution of competitive fitness in experimental populations of *E. coli*: What makes one genotype better competitor than another? *Antonie van Leeuwenhoek* **73**: 35–47.
- 536 LENSKI, R. E., M. R. ROSE, S. C. SIMPSON, and S. C. TADLER, 1991 Long-term experimental evolution in *Escherichia coli*. I. Adaptation and divergence during 2,000 generations. *American Naturalist* **138**: 1315–1341.
- 540 MAITI, M., H.-C. LEE, and Y. LIU, 2007 QIP, a putative exonuclease, interacts with the *Neurospora* Argonaute protein and facilitates conversion of duplex siRNA into single strands. *Genes Dev* **21**: 590–600.
- 542 MARGOLIN, B. S., M. FREITAG, and E. U. SELKER, 1997 Improved plasmids for gene targeting at the *his-3* locus of *Neurospora crassa* by electroporation. *Fungal Genetics Newsletter* **44**: 34–36.
- 544 MCCLUSKEY, K., A. WIEST, and M. PLAMANN, 2010 The fungal genetics stock center: a repository for 50 years of fungal genetics research. *J Biosci* **35**: 119–126.
- 548 MCELREATH, R., 2015 *Statistical Rethinking - A Bayesian course for with examples in R and Stan*. CRC Press, New York.
- 550 METZENBERG, R. L., 2003 Vogel's medium N salts: Avoiding the need for ammonium nitrate. *Fungal Genetics Newsletter* **50**: 14.
- 552 METZENBERG, R. L., and N. L. GLASS, 1990 Mating type and mating strategies in *Neurospora*. *BioEssays* **12**: 53–59.

- 554 MEUNIER, C., S. HOSSEINI, N. HEIDARI, Z. MARYUSH, and H. JOHANNESSON, 2018 Multi-  
level selection in the filamentous ascomycete *Neurospora tetrasperma*. *The American Naturalist*  
556 **191**: 290–305.
- NINOMIYA, Y., K. SUZUKI, C. ISHII, and H. INOUE, 2004 Highly efficient gene replacements  
558 in *Neurospora* strains deficient for non-homologous end-joining. *Proceedings of the National*  
*Academy of Sciences* **101**: 12248–12253.
- 560 OAKLEY, C. E., C. L. WEIL, P. L. KRETZ, and B. R. OAKLEY, 1987 Cloning of the *riboB* locus  
of *Aspergillus nidulans*. *Gene* **53**: 293–298.
- 562 PITTENGER, T., and K. C. ATWOOD, 1956 Stability of nuclear proportions during growth of  
*Neurospora* heterokaryons. *Genetics* **41**: 227–241.
- 564 PRINGLE, A., and J. W. TAYLOR, 2002 The fitness of filamentous fungi. *Trends in Microbiology*  
**10**: 474–481.
- 566 R CORE TEAM, 2018 *R: A language and environment for statistical computing*. R Foundation for  
Statistical Computing, Vienna, Austria.
- 568 RICHARD, F., N. L. GLASS, and A. PRINGLE, 2012 Cooperation among germinating spores fa-  
cilitates the growth of the fungus, *Neurospora crassa*. *Biology Letters* **8**: 419–422.
- 570 ROCHE, C. M., J. J. LOROS, K. MCCLUSKEY, and N. L. GLASS, 2014 *Neurospora crassa*:  
looking back and looking forward at a model microbe. *Am J Bot* **101**: 2022–2035.
- 572 ROMERO-OLIVARES, A. L., J. W. TAYLOR, and K. K. TRESEDER, 2015 *Neurospora discreta* as  
a model to assess adaptation of soil fungi to warming. *BMC Evol Biol* **15**: 198.
- 574 RYAN, F. J., G. W. BEADLE, and E. L. TATUM, 1943 The tube method of measuring the growth  
rate of *Neurospora*. *American Journal of Botany* **30**: 784–799.

576 SAMILS, N., J. OLIVA, and H. JOHANNESSON, 2014 Nuclear interactions in a heterokaryon:  
insight from the model *Neurospora tetrasperma*. Proceedings of the Royal Society B: Biological  
578 Sciences **281**: 20140084.

SCHOUSTRA, S. E., M. SLAKHORST, A. J. M. DEBETS, and R. F. HOEKSTRA, 2005 Comparing  
580 artificial and natural selection in rate of adaptation to genetic stress in *Aspergillus nidulans*.  
Journal of Evolutionary Biology **18**: 771–778.

582 SMITH, A. M., L. E. HEISLER, R. P. ST.ONGE, E. FARIAS-HESSON, I. M. WALLACE, *et al.*,  
2010 Highly-multiplexed barcode sequencing: an efficient method for parallel analysis of pooled  
584 samples. Nucleic Acids Research **38**: e142–e142.

WICKHAM, H., 2016 *ggplot2: Elegant Graphics for Data Analysis*. Springer-Verlag New York.

586 WITWER, C. T., G. H. REED, C. N. GUNDRY, J. G. VANDERSTEEN, and R. J. PRYOR, 2003  
High-resolution genotyping by amplicon melting analysis using LCGreen. Clinical Chemistry  
588 **49**: 853–860.

WOJDACZ, T. K., and A. DOBROVIC, 2007 Methylation-sensitive high resolution melting (MS-  
590 HRM): a new approach for sensitive and high-throughput assessment of methylation. Nucleic  
Acids Research **35**: e41.

592 ZHAO, J., P. GLADIEUX, E. HUTCHISON, J. BUCHE, C. HALL, *et al.*, 2015 Identification of  
allorecognition loci in *Neurospora crassa* by genomics and evolutionary approaches. Molecular  
594 Biology and Evolution **32**: 2417–2432.

## Supplementary Information

### 596 Supplementary Figures

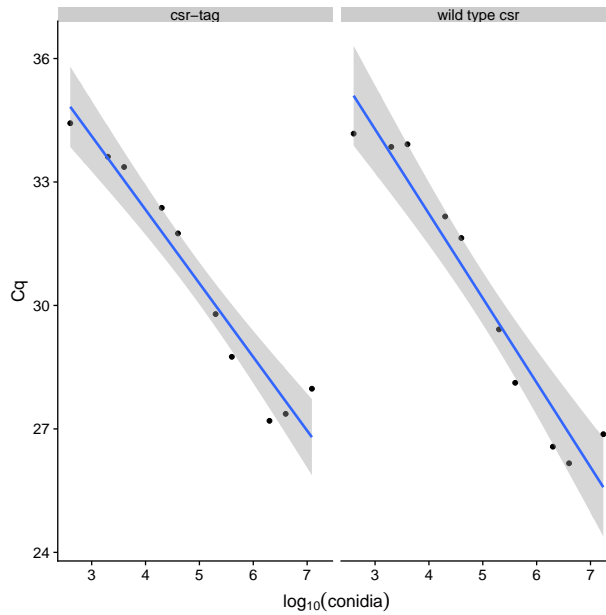

Figure S1: Correlation between number of conidia used in DNA extraction (log-scale) and number of PCR cycles required to detect the PCR-product. Differences between the alleles are not significant.

### Supplementary Tables



Table S1: Primers used in the study.

| Name      | Sequence                                                                                                |
|-----------|---------------------------------------------------------------------------------------------------------|
| csrL-f    | TGC CAT GTT CTT CTT GAG CC                                                                              |
| csrL-r    | CCC ATG TTT GCG CGG ACC TGG AGA AGC GGC TGG ACT TAC ACT ATT ACA TGA ATT CGG ATG TTT GCG AAA AAG CTC TGG |
| csrR-f    | CAC TGC AAC TTT CTC CTG CGC CAG AGC TTT TTC GCA AAC ATC CGA ATT CAT GTA ATA GTG TAA GTC CAG CCG CTT CTC |
| csrR-r    | GAC AAT GGT GGG CTT CTT GG                                                                              |
| csr-hrm-f | CGT CAT CTC TCA AGC CCA CT                                                                              |
| csr-hrm-r | GAG AAG CGG CTG GAC TTA CA                                                                              |
